# Supplementary material for: Solvent exchange-induced facile recrystallisation and particle size control of sulphide solid electrolytes for all-solid-state Li-ion batteries
Source: Royal Society of Chemistry journal article supplement (doi:10.1039/d2ta06632g), 2022-01-01
Supplement: d2ta06632g1.pdf [file d2ta06632g1.pdf]

## Supporting Information

### **Solvent Exchange-Induced Facile Recrystallisation and Particle Size Control of Sulphide Solid Electrolytes for All-Solid-State Li-Ion Batteries**

*Mukarram Ali, Su Cheol Han, Heetaek Park, You-Jin Lee, Byung-Gon Kim, Jun-Woo Park, Junho Park, Jeong-Hee Choi, Yoon-Cheol Ha\**

Mukarram Ali, Su Cheol Han, Heetaek Park, You-Jin Lee, Byung-Gon Kim, Jun-Woo Park, Junho Park, Jeong-Hee Choi, Yoon-Cheol Ha

Next Generation Battery Research Center, Korea Electrotechnology Research Institute (KERI), Changwon 51543, Republic of Korea

Email: [ycha@keri.re.kr](mailto:ycha@keri.re.kr) (Yoon-Cheol Ha)

Mukarram Ali, Byung-Gon Kim, Jun-Woo Park, Jeong-Hee Choi

Division of Electric Energy Materials Engineering, University of Science and Technology (UST), Daejeon, 34113, Republic of Korea

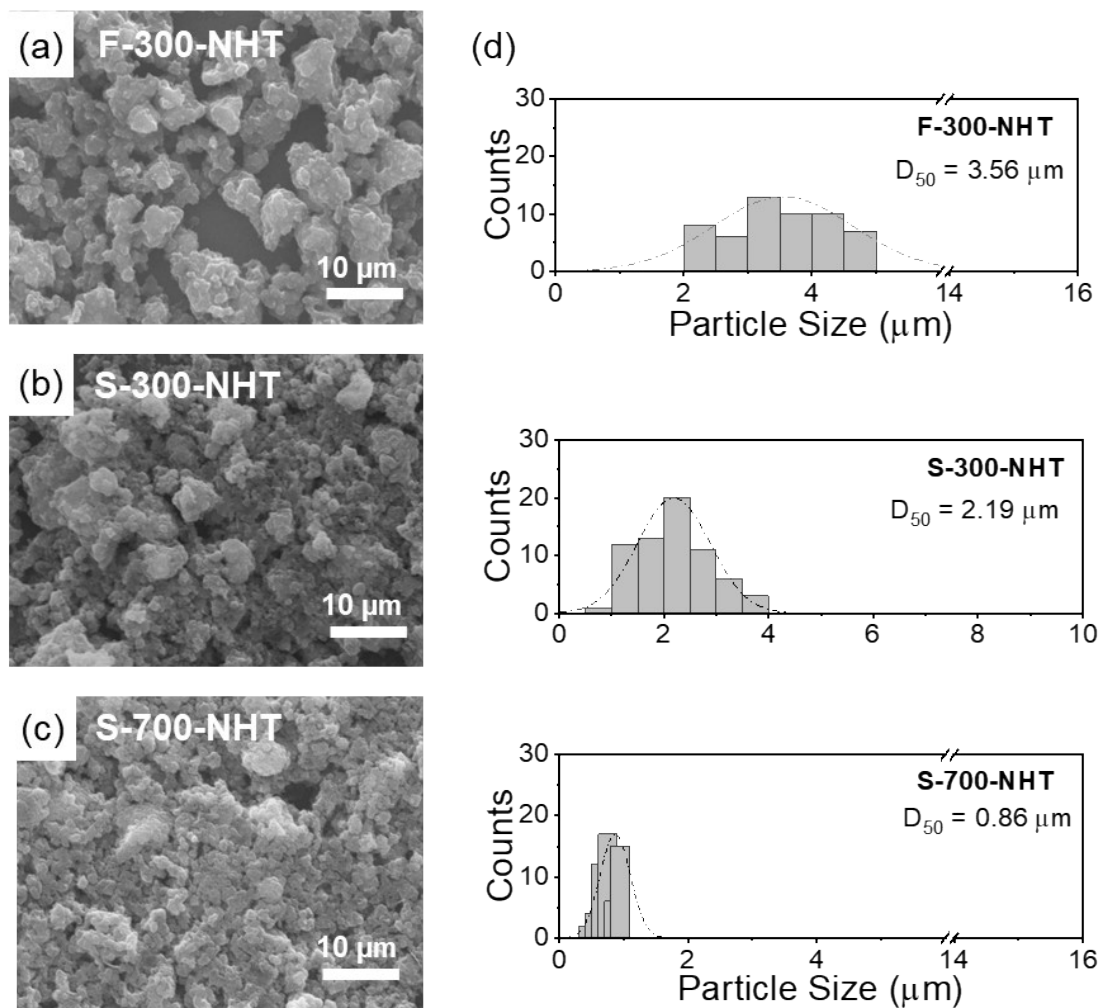

**Figure S1.** (a-c) SEM images of SSE powders prepared by the solvent exchange technique (a: F-300-NHT b: S-300-NHT, and c: S-700-NHT). (d) Particle size distribution of F-300-NHT, S-300-NHT, and S-700-NHT SSE powders for the estimation of the  $D_{50}$  values.

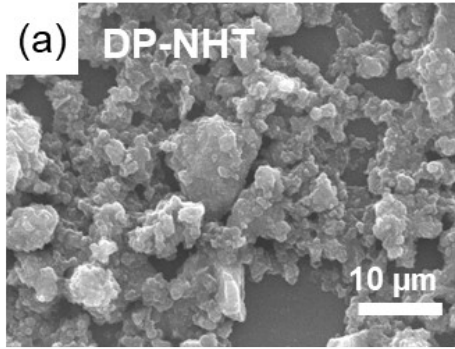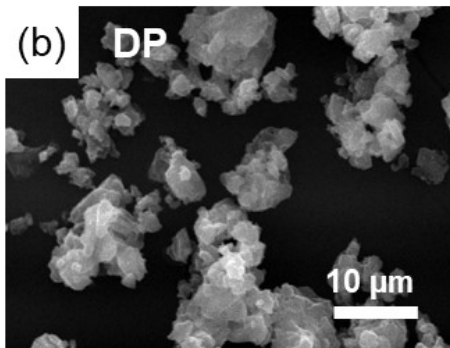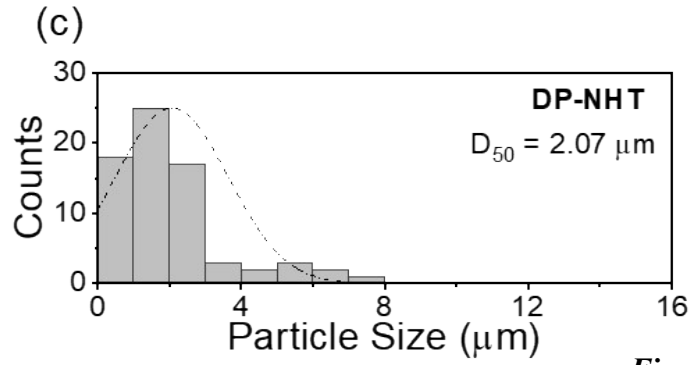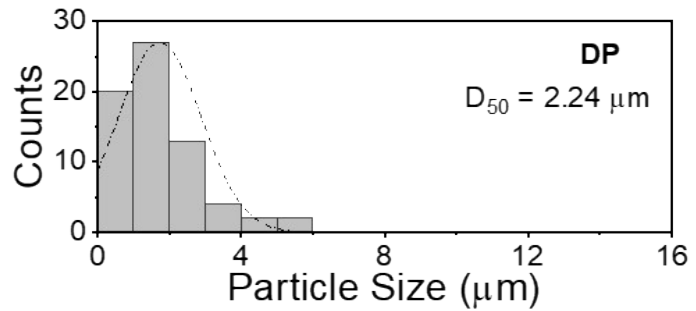

**Figure**

*S2. (a-b) SEM images of the DP SSE powders (a:*

*DP-NHT and b: DP). (c) Particle size distribution of DP-NHT and DP SSE powders for the estimation of the  $D_{50}$  values.*

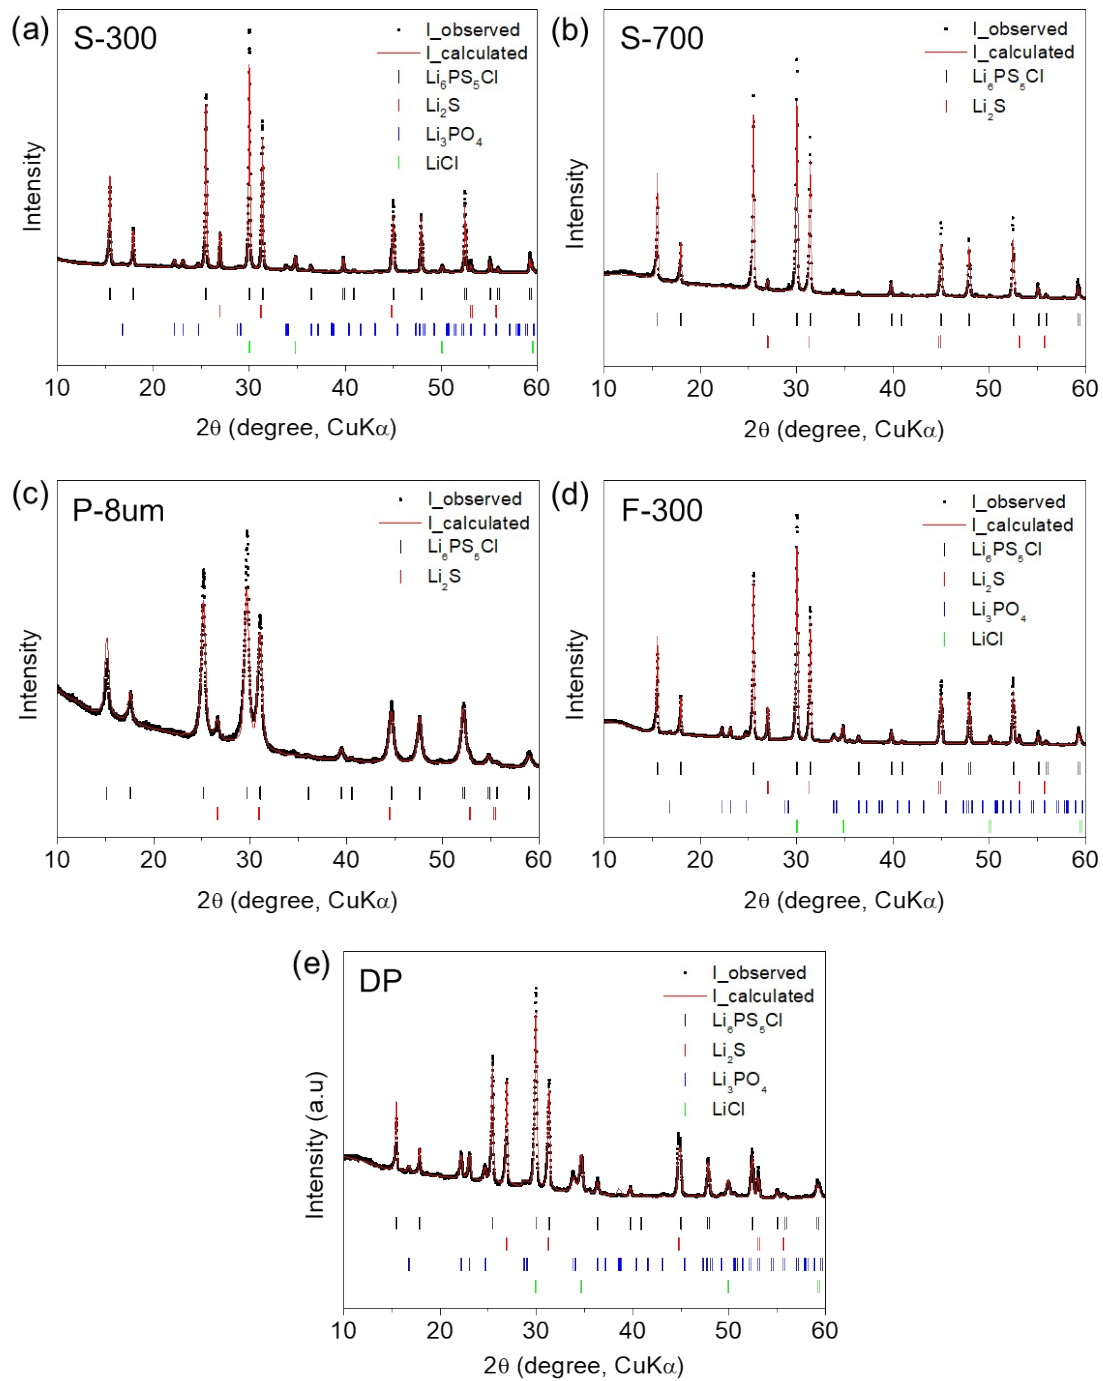

**Figure S3.** Rietveld refinement results for a) S-300, b) S-700, c) P-8 $\mu\text{m}$ , d) F-300, and e) DP SSE powders.

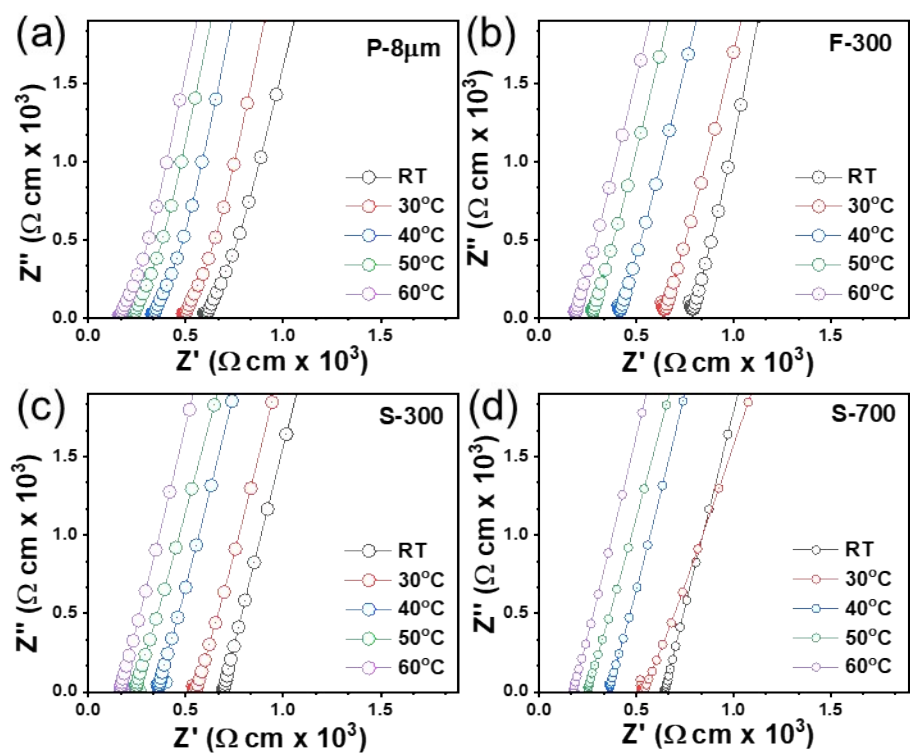

**Figure S4.** (a-d) EIS Spectra of P-8 $\mu\text{m}$ , F-300, S-300, and S-700 SSEs under varying temperatures between 25  $^\circ\text{C}$  to 60  $^\circ\text{C}$ .

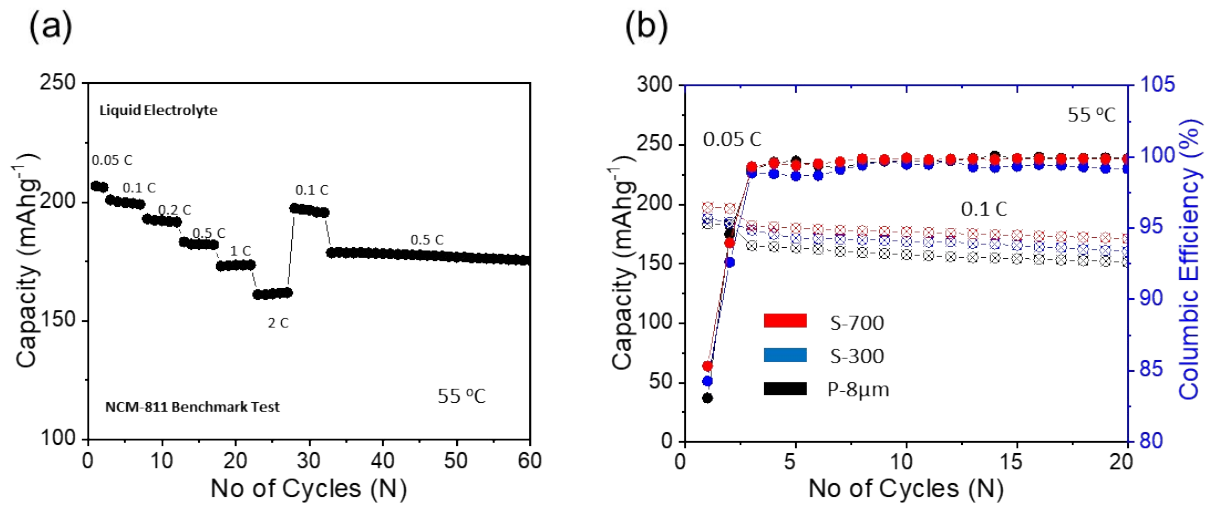

**Figure S5.** (a) Benchmark test for LNO-coated NCM-811 with liquid electrolyte. (b) Capacity retention and Coulombic efficiency of the ASSLBs with P-8μm, S-300, and S-700, cycled at 0.1 C for 20 cycles.



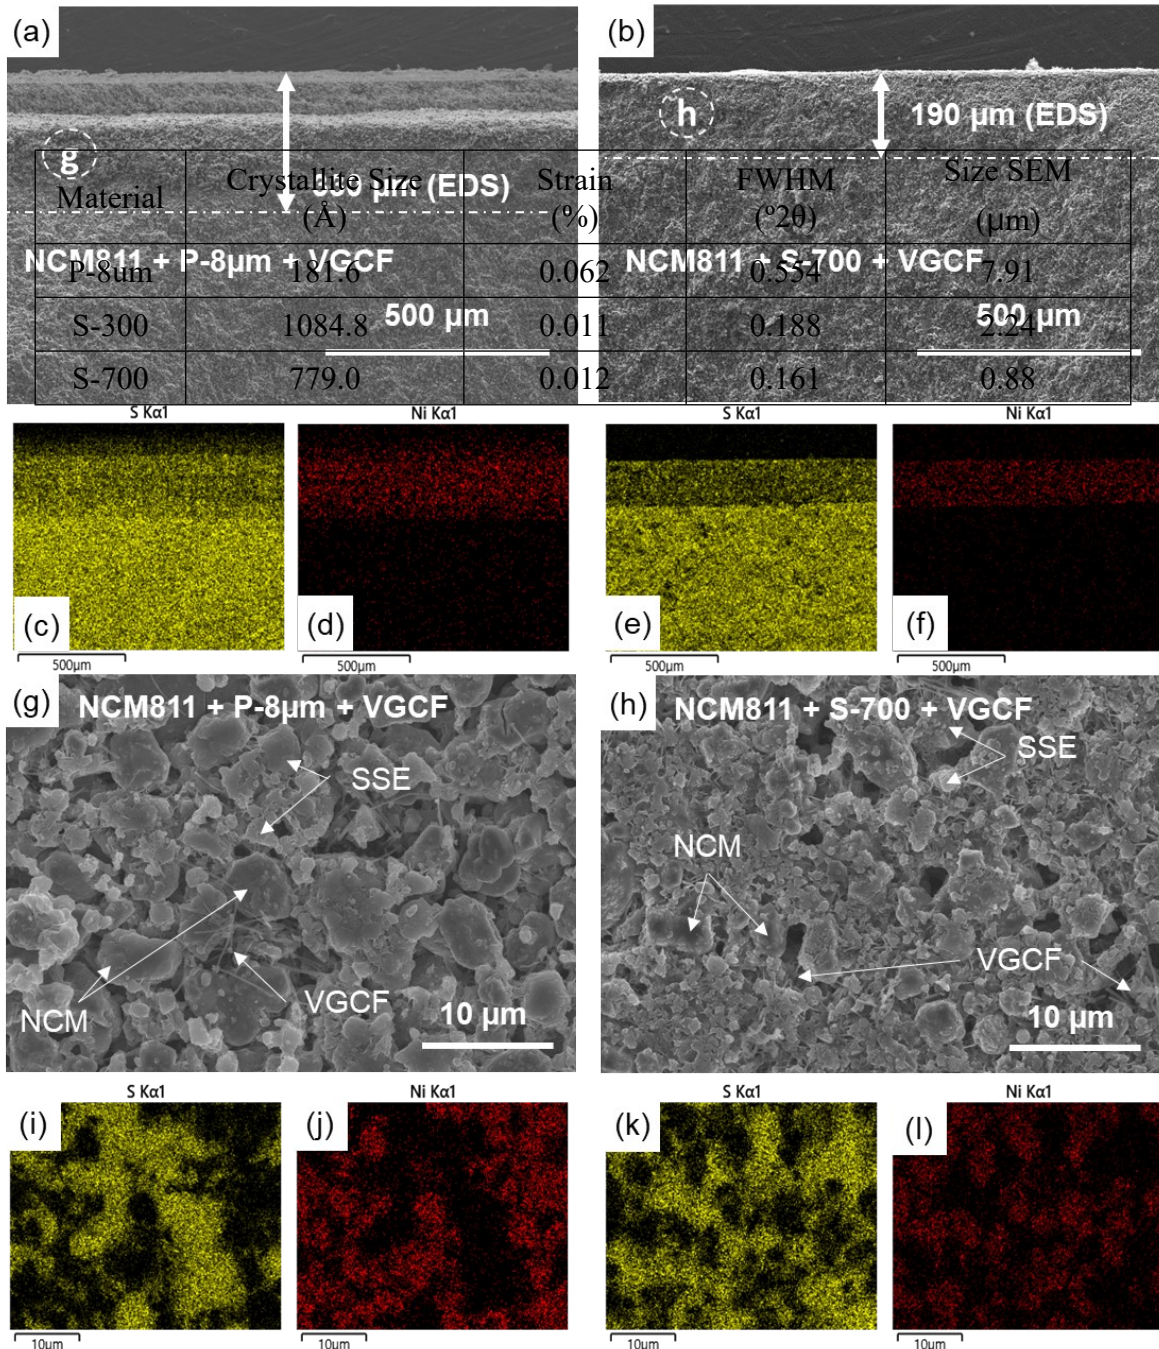

**Figure S6.** (a and b) The cross-sectional SEM images of cathode composite | SSE pellet containing P-8 $\mu$ m and S-700 SSE respectively. (c-f) EDS mapping for sulfur (S) and nickel (Ni) to differentiate cathode composite and SSE part as well as calculating the thickness. (g-f) cross-sectional SEM images of cathode composite for NCM811 + P-8 $\mu$ m + VGCF and NCM811 + S-700 + VGCF samples, respectively. The arrows indicate dispersed NCM811, SSE and VGCF in cathode composite. (i-l) EDS mapping for S and Ni to indicate the dispersion of SSE and NCM in cathode composite for NCM811 + P-8 $\mu$ m + VGCF, and NCM811 + S-700 + VGCF samples, respectively.

**Table S1.** Summary of the strain and FWHM analysis of P-8 $\mu$ m, S-300, and S-700 SSE powders.
